# Supplementary material for: Application of a sensor system for determining the kind and quantity of two component VOC mixtures in air after the use of solvents
Source: Royal Society of Chemistry journal article supplement (doi:10.1039/b907820g), 2009-01-01
Supplement: b907820g.pdf [file b907820g.pdf]

Table S1. Main features and the applicability of sensors utilized in sensor array.

| Sensor   | Features                                                                         | Application                                                                                                                                                                                              | Sensitivity characteristics             |
|----------|----------------------------------------------------------------------------------|----------------------------------------------------------------------------------------------------------------------------------------------------------------------------------------------------------|-----------------------------------------|
| TGS 821  | High sensitivity to hydrogen gas                                                 | Hydrogen gas detection for: <ul style="list-style-type: none"> <li>• transformer maintenance</li> <li>• batteries</li> <li>• steel industry usage</li> </ul>                                             | 1000-5000 ppm ethanol                   |
| TGS 822  | High sensitivity to organic solvent vapors such as ethanol                       | <ul style="list-style-type: none"> <li>• Breath alcohol detectors</li> <li>• Gas leak detectors/alarms</li> <li>• Solvent detectors for factories, dry cleaners, and semiconductor industries</li> </ul> | 50-5000 ppm ethanol                     |
| TGS 824  | High sensitivity to amine compounds                                              | <ul style="list-style-type: none"> <li>• Ammonia leak detection in refrigerators</li> <li>• Ventilation control for the agricultural and poultry industries</li> </ul>                                   | 30-300 ppm NH <sub>3</sub>              |
| TGS 825  | High sensitivity to hydrogen sulfide                                             | Hydrogen sulfide detectors/alarms                                                                                                                                                                        | 5-100 ppm H <sub>2</sub> S              |
| TGS 826  | High sensitivity to amine compounds                                              | <ul style="list-style-type: none"> <li>• Ammonia leak detection in refrigerators</li> <li>• Ventilation control for the agricultural and poultry industries</li> </ul>                                   | 9-100 ppm NH <sub>3</sub>               |
| TGS 880  | Sensitive to humidity fumes from food (alcohol, odor)                            | Kitchen – cooking control                                                                                                                                                                                | 30-3000 ppm ethanol                     |
| TGS 883  | Sensitive to water vapor                                                         | Kitchen – cooking control                                                                                                                                                                                | 1-100 g/m <sup>3</sup> H <sub>2</sub> O |
| TGS 800  | Sensitive to air Contaminants in general                                         | <ul style="list-style-type: none"> <li>• Air quality control</li> <li>• Ventilation control</li> </ul>                                                                                                   | 1-100 ppm ethanol                       |
| TGS 2201 | High sensitivity to gasoline & diesel exhaust gases                              | Automobile ventilation control                                                                                                                                                                           | 1-30 ppm ethanol                        |
| TGS 2201 | High sensitivity to exhaust gases emitted by to gasoline & diesel-fueled engines | Automobile ventilation control                                                                                                                                                                           | 1-30 ppm ethanol                        |
| TGS 2106 | High sensitivity to exhaust gases emitted by to diesel-fueled engines            | Automobile ventilation control                                                                                                                                                                           | 0.5-5 ppm NO <sub>2</sub>               |
| TGS 2104 | High sensitivity to exhaust gases emitted by to gasoline-fueled engines          | Automobile ventilation control                                                                                                                                                                           | 2-20ppm C <sub>10</sub> H <sub>22</sub> |
| TGS 2602 | High sensitivity to VOCs and odorous gases                                       | <ul style="list-style-type: none"> <li>• Air cleaners</li> <li>• Ventilation control</li> <li>• Air quality monitors</li> <li>• VOC monitors</li> <li>• Odor monitors</li> </ul>                         | 1-30 ppm ethanol                        |
| TGS 2620 | High sensitivity to alcohol and organic solvent vapors                           | <ul style="list-style-type: none"> <li>• Alcohol testers</li> <li>• Organic vapor detectors/ alarms</li> <li>• Solvent detectors for factories, dry cleaners and semiconductor industries</li> </ul>     | 50-5000 ppm ethanol                     |
| TGS 2600 | High sensitivity to gaseous air contaminants                                     | <ul style="list-style-type: none"> <li>• Air cleaners</li> <li>• Ventilation control</li> <li>• Air quality monitors</li> </ul>                                                                          | 1-100 ppm ethanol                       |
